# Supplementary material
Source: PubMed Central journal article supplement (PMC6008200)
Supplement: NIHMS950896-supplement-Supplementary_Materials__tables.pdf [file NIHMS950896-supplement-Supplementary_Materials__tables.pdf]

## Supplementary tables

| Alignment quality                     |                        |                         |                        |                         |                        |                         |       |
|---------------------------------------|------------------------|-------------------------|------------------------|-------------------------|------------------------|-------------------------|-------|
|                                       | Replicate 1, left read | Replicate 1, right read | Replicate 2, left read | Replicate 2, right read | Replicate 3, left read | Replicate 3, right read |       |
| Mapped reads %                        | 76.10%                 | 76.20%                  | 79.20%                 | 78.30%                  | 75.90%                 | 73.60%                  |       |
| Multimapped reads %                   | 5.10%                  | 5.10%                   | 4.90%                  | 4.90%                   | 5.30%                  | 5.30%                   |       |
| Concordant pairs among mapped pairs % | 97.50%                 |                         | 97.40%                 |                         | 97.10%                 |                         |       |
| Sequencing quality                    |                        |                         |                        |                         |                        |                         |       |
|                                       | Replicate 1, left read | Replicate 1, right read | Replicate 2, left read | Replicate 2, right read | Replicate 3, left read | Replicate 3, right read |       |
| No of sequenced reads                 | 79,379,381             | 79,379,381              | 73,114,375             | 73,114,375              | 76,170,070             | 76,170,070              |       |
| Base position                         | Mean Phred score       |                         |                        |                         |                        |                         |       |
| 1                                     | Mean Phred score       | 30.01                   | 29.68                  | 29.99                   | 29.73                  | 30.05                   | 29.77 |
| 2                                     | Mean Phred score       | 30.62                   | 29.90                  | 30.62                   | 29.76                  | 30.67                   | 29.87 |
| 3                                     | Mean Phred score       | 30.63                   | 29.70                  | 30.62                   | 29.65                  | 30.68                   | 29.75 |
| 4                                     | Mean Phred score       | 30.63                   | 29.54                  | 30.62                   | 29.46                  | 30.68                   | 29.59 |
| 5                                     | Mean Phred score       | 30.62                   | 29.52                  | 30.63                   | 29.40                  | 30.72                   | 29.53 |
| 6                                     | Mean Phred score       | 34.08                   | 33.68                  | 34.07                   | 33.54                  | 34.24                   | 33.69 |
| 7                                     | Mean Phred score       | 34.04                   | 33.77                  | 34.05                   | 33.57                  | 34.19                   | 33.77 |
| 8                                     | Mean Phred score       | 33.74                   | 33.50                  | 33.73                   | 33.31                  | 33.88                   | 33.49 |
| 9                                     | Mean Phred score       | 33.73                   | 33.50                  | 33.72                   | 33.31                  | 33.86                   | 33.44 |
| 10                                    | Mean Phred score       | 33.32                   | 33.19                  | 33.33                   | 33.03                  | 33.51                   | 33.13 |
| 11                                    | Mean Phred score       | 33.80                   | 33.52                  | 33.80                   | 33.35                  | 33.98                   | 33.45 |
| 12                                    | Mean Phred score       | 33.79                   | 33.55                  | 33.79                   | 33.35                  | 33.98                   | 33.47 |
| 13                                    | Mean Phred score       | 33.67                   | 33.46                  | 33.66                   | 33.26                  | 33.81                   | 33.35 |
| 14                                    | Mean Phred score       | 33.63                   | 33.37                  | 33.62                   | 33.17                  | 33.75                   | 33.28 |
| 15                                    | Mean Phred score       | 33.59                   | 33.38                  | 33.59                   | 33.20                  | 33.76                   | 33.28 |
| 16                                    | Mean Phred score       | 33.60                   | 33.41                  | 33.59                   | 33.24                  | 33.73                   | 33.22 |
| 17                                    | Mean Phred score       | 33.52                   | 33.37                  | 33.52                   | 33.20                  | 33.71                   | 33.24 |
| 18                                    | Mean Phred score       | 33.51                   | 33.35                  | 33.51                   | 33.19                  | 33.63                   | 33.22 |
| 19                                    | Mean Phred score       | 33.53                   | 33.37                  | 33.52                   | 33.22                  | 33.70                   | 33.23 |
| 20                                    | Mean Phred score       | 33.51                   | 33.31                  | 33.51                   | 33.18                  | 33.62                   | 33.16 |
| 21                                    | Mean Phred score       | 33.49                   | 33.29                  | 33.48                   | 33.16                  | 33.63                   | 33.14 |
| 22                                    | Mean Phred score       | 33.48                   | 33.27                  | 33.48                   | 33.14                  | 33.60                   | 33.12 |
| 23                                    | Mean Phred score       | 33.46                   | 33.25                  | 33.44                   | 33.10                  | 33.57                   | 33.09 |
| 24                                    | Mean Phred score       | 33.44                   | 33.23                  | 33.43                   | 33.09                  | 33.55                   | 33.06 |
| 25                                    | Mean Phred score       | 33.45                   | 33.23                  | 33.44                   | 33.10                  | 33.54                   | 33.06 |
| 26                                    | Mean Phred score       | 33.40                   | 33.20                  | 33.40                   | 33.07                  | 33.55                   | 32.97 |
| 27                                    | Mean Phred score       | 33.53                   | 33.17                  | 33.54                   | 33.06                  | 33.66                   | 32.95 |
| 28                                    | Mean Phred score       | 33.56                   | 33.19                  | 33.57                   | 33.07                  | 33.63                   | 32.95 |
| 29                                    | Mean Phred score       | 33.49                   | 33.15                  | 33.51                   | 33.03                  | 33.51                   | 32.92 |
| 30                                    | Mean Phred score       | 33.47                   | 33.14                  | 33.48                   | 33.01                  | 33.49                   | 32.90 |
| 31                                    | Mean Phred score       | 33.40                   | 33.14                  | 33.41                   | 33.01                  | 33.45                   | 32.87 |
| 32                                    | Mean Phred score       | 33.37                   | 33.11                  | 33.37                   | 32.98                  | 33.45                   | 32.81 |
| 33                                    | Mean Phred score       | 33.28                   | 33.06                  | 33.30                   | 32.94                  | 33.37                   | 32.81 |
| 34                                    | Mean Phred score       | 33.26                   | 33.05                  | 33.27                   | 32.93                  | 33.34                   | 32.74 |
| 35                                    | Mean Phred score       | 33.23                   | 33.00                  | 33.24                   | 32.87                  | 33.32                   | 32.69 |
| 36                                    | Mean Phred score       | 33.20                   | 32.96                  | 33.21                   | 32.85                  | 33.27                   | 32.67 |
| 37                                    | Mean Phred score       | 33.19                   | 32.95                  | 33.19                   | 32.83                  | 33.26                   | 32.67 |
| 38                                    | Mean Phred score       | 33.14                   | 32.94                  | 33.14                   | 32.82                  | 33.20                   | 32.62 |
| 39                                    | Mean Phred score       | 33.11                   | 32.92                  | 33.12                   | 32.81                  | 33.14                   | 32.56 |
| 40                                    | Mean Phred score       | 33.06                   | 32.90                  | 33.08                   | 32.79                  | 33.13                   | 32.53 |
| 41                                    | Mean Phred score       | 33.03                   | 32.87                  | 33.05                   | 32.76                  | 33.09                   | 32.46 |
| 42                                    | Mean Phred score       | 32.99                   | 32.84                  | 33.00                   | 32.72                  | 33.04                   | 32.45 |
| 43                                    | Mean Phred score       | 32.96                   | 32.81                  | 32.98                   | 32.69                  | 33.04                   | 32.43 |
| 44                                    | Mean Phred score       | 32.92                   | 32.76                  | 32.95                   | 32.64                  | 32.94                   | 32.35 |
| 45                                    | Mean Phred score       | 32.87                   | 32.72                  | 32.88                   | 32.61                  | 32.91                   | 32.31 |
| 46                                    | Mean Phred score       | 32.87                   | 32.74                  | 32.89                   | 32.63                  | 32.91                   | 32.28 |
| 47                                    | Mean Phred score       | 32.79                   | 32.68                  | 32.79                   | 32.55                  | 32.83                   | 32.25 |
| 48                                    | Mean Phred score       | 32.79                   | 32.64                  | 32.78                   | 32.53                  | 32.83                   | 32.23 |
| 49                                    | Mean Phred score       | 32.77                   | 32.61                  | 32.76                   | 32.50                  | 32.80                   | 32.17 |
| 50                                    | Mean Phred score       | 32.74                   | 32.58                  | 32.74                   | 32.47                  | 32.74                   | 32.13 |
| 51                                    | Mean Phred score       | 32.76                   | 32.56                  | 32.75                   | 32.44                  | 32.70                   | 32.05 |
| 52                                    | Mean Phred score       | 32.71                   | 32.54                  | 32.71                   | 32.43                  | 32.66                   | 31.99 |
| 53                                    | Mean Phred score       | 32.63                   | 32.48                  | 32.63                   | 32.37                  | 32.58                   | 31.93 |
| 54                                    | Mean Phred score       | 32.62                   | 32.48                  | 32.62                   | 32.36                  | 32.51                   | 31.90 |
| 55                                    | Mean Phred score       | 32.63                   | 32.48                  | 32.63                   | 32.37                  | 32.54                   | 31.94 |
| 56                                    | Mean Phred score       | 32.60                   | 32.46                  | 32.59                   | 32.34                  | 32.49                   | 31.88 |
| 57                                    | Mean Phred score       | 32.59                   | 32.42                  | 32.58                   | 32.31                  | 32.44                   | 31.78 |
| 58                                    | Mean Phred score       | 32.59                   | 32.42                  | 32.58                   | 32.31                  | 32.43                   | 31.78 |
| 59                                    | Mean Phred score       | 32.51                   | 32.39                  | 32.51                   | 32.26                  | 32.30                   | 31.75 |
| 60                                    | Mean Phred score       | 32.53                   | 32.34                  | 32.52                   | 32.21                  | 32.33                   | 31.71 |
| 61                                    | Mean Phred score       | 32.48                   | 32.31                  | 32.48                   | 32.19                  | 32.27                   | 31.69 |
| 62                                    | Mean Phred score       | 32.44                   | 32.28                  | 32.44                   | 32.15                  | 32.18                   | 31.59 |
| 63                                    | Mean Phred score       | 32.40                   | 32.27                  | 32.39                   | 32.13                  | 32.14                   | 31.54 |
| 64                                    | Mean Phred score       | 32.39                   | 32.29                  | 32.38                   | 32.14                  | 32.16                   | 31.57 |
| 65                                    | Mean Phred score       | 32.32                   | 32.22                  | 32.32                   | 32.07                  | 32.08                   | 31.53 |
| 66                                    | Mean Phred score       | 32.34                   | 32.21                  | 32.33                   | 32.07                  | 32.01                   | 31.43 |
| 67                                    | Mean Phred score       | 32.37                   | 32.21                  | 32.34                   | 32.06                  | 32.05                   | 31.41 |
| 68                                    | Mean Phred score       | 32.33                   | 32.13                  | 32.30                   | 31.98                  | 31.97                   | 31.35 |
| 69                                    | Mean Phred score       | 32.25                   | 32.10                  | 32.22                   | 31.96                  | 31.92                   | 31.32 |
| 70                                    | Mean Phred score       | 32.28                   | 32.08                  | 32.25                   | 31.95                  | 31.92                   | 31.26 |
| 71                                    | Mean Phred score       | 32.22                   | 32.01                  | 32.19                   | 31.88                  | 31.83                   | 31.20 |
| 72                                    | Mean Phred score       | 32.19                   | 31.97                  | 32.17                   | 31.84                  | 31.78                   | 31.13 |
| 73                                    | Mean Phred score       | 32.20                   | 31.98                  | 32.18                   | 31.86                  | 31.77                   | 31.13 |
| 74                                    | Mean Phred score       | 32.14                   | 31.92                  | 32.13                   | 31.79                  | 31.71                   | 31.04 |
| 75                                    | Mean Phred score       | 31.79                   | 31.50                  | 31.76                   | 31.35                  | 31.19                   | 30.51 |

Supplementary Table 1. Sequencing and alignment quality metrics for 3 hDRG RNA-seq replicates.

## Gene list

---

**SHOX2:** DRG enriched in human and mouse, developmentally relevant in CNS.

Scott A, Hasegawa H, Sakurai K, Yaron A, Cobb J, Wang F. Transcription Factor Shox2 Is Required for Proper Development of TrkB-Expressing Mechanosensory Neurons. *The Journal of neuroscience: the official journal of the Society for Neuroscience* 2011;31(18):6741

---

**SKOR2:** DRG enriched in human and mouse, developmentally relevant in development of inner ear and related ganglion  
Hori K, Hoshino M. GABAergic neuron specification in the spinal cord, the cerebellum, and the cochlear nucleus. *Neural plasticity* 2012;2012

---

**SCRT2:** DRG enriched in human and mouse. The Scratch family of genes are involved in neural development.

Vieceli FM, Simões-Costa M, Turri JA, Kanno T, Bronner M, Yan CY. The transcription factor chicken Scratch2 is expressed in a subset of early postmitotic neural progenitors. *Gene Expression Patterns* 2013;13(5):189-196.

---

**INSM2:** DRG enriched in human and mouse. INSM1 is involved in neural development.

Wildner H, Gierl MS, Strehle M, Pla P, Birchmeier C. *Insm1* (IA-1) is a crucial component of the transcriptional network that controls differentiation of the sympatho-adrenal lineage. *Development* 2008;135(3):473-481.

---

**HMX1:** TF known to be functional in DRG development, expressed but with divergent expression patterns in hDRG and mDRG.

Wang W, Lo P, Frasch M, Lufkin T. *Hmx*: an evolutionary conserved homeobox gene family expressed in the developing nervous system in mice and *Drosophila*. *Mechanisms of development* 2000;99(1):123-137.

---

**SHH:** Expressed but not enriched in hDRG, primary TF in Hedgehog signaling in DRG development.

Guan W, Wang G, Scott SA, Condic ML. *Shh* influences cell number and the distribution of neuronal subtypes in dorsal root ganglia. *Developmental biology* 2008;314(2):317-328.

---

**KCNIP3 (DREAM):** Neuronally enriched, known to mediate inflammation and modulate pain.

Cheng H-YM, Pitcher GM, Laviolette SR, Whishaw IQ, Tong KI, Kockeritz LK, Wada T, Joza NA, Crackower M, Goncalves J. DREAM is a critical transcriptional repressor for pain modulation. *Cell* 2002;108(1):31-43.

---

**TWIST1:** Neuronally enriched, involved in Wnt signaling in human neural crest cells derived from pluripotent cells

Noisa P, Lund C, Kanduri K, Lund R, Lähdesmäki H, Laheesmaa R, Lundin K, Chokeywattanalert H, Otonkoski T, Tuuri T. Notch signaling regulates the differentiation of neural crest from human pluripotent stem cells. *J Cell Sci* 2014;127(9):2083-2094.

---

**TFAP2A:** Weakly enriched in hDRG and mDRG, key TF in neural crest lineage.

Barrallo-Gimeno A, Holzschuh J, Driever W, Knapik EW. Neural crest survival and differentiation in zebrafish depends on *mont blanc/ tfap2a* gene function. *Development* 2004;131(7):1463-1477.

---

**SOX10, SOX12, MYT1L:** Pan-neuronal TFs

---

**NOVA1:** Pan neuronally expressed splicing factor, but relatively less abundant in hDRG and mDRG. Along with NOVA2, known to regulate splicing in brain.

Ule J, Jensen KB, Ruggiu M, Mele A, Ule A, Darnell RB. CLIP identifies Nova-regulated RNA networks in the brain. *Science* 2003;302(5648):1212-1215.

---

**RBFOX3:** Pan neuronally expressed. Gene product NeuN is marker of neurons. Involved in neuronal splicing.

Duan W, Zhang Y-P, Hou Z, Huang C, Zhu H, Zhang CQ, Yin Q. Novel insights into NeuN: from neuronal marker to splicing regulator. *Molecular neurobiology* 2016;53(3):1637-1647.

---

**CELF4:** Pan neuronally expressed, implicated in splicing in retinal ganglion.

Guerrette TA. Alternative Splicing Factor CELF4 is Implicated in Regulation of Ganglion Cell Differentiation During Murine Retinal Development. 2012.

---

**RBM11:** Pan neuronally expressed gene whose product is an RNA binding protein.

---

**KIF5C:** Pan neuronally expressed. Shown to be involved in dendritic mRNA transport, role in pseudounipolar neurons unknown.

Kanai Y, Dohmae N, Hirokawa N. Kinesin transports RNA: isolation and characterization of an RNA transporting granule. *Neuron* 2004;43(4):513-525

---

**CPEB1:** Pan neuronally expressed. Involved in dendritic transport, trafficking role in pseudounipolar neurons unclear.

Implicated in translation regulation in hyperalgesic priming models in rats.

Bogen O, Alessandri-Haber N, Chu C, Gear RW, Levine JD. Generation of a pain memory in the primary afferent nociceptor triggered by PKC $\epsilon$  activation of CPEB. *Journal of Neuroscience* 2012;32(6):2018-2026

---

**DDX25:** Pan neuronally expressed, and shown to be involved in RNA transport during spermatogenesis.

Sheng Y, Tsai-Morris C-H, Gutti R, Maeda Y, Dufau ML. Gonadotropin-regulated testicular RNA helicase (GRTH/Ddx25) is a transport protein involved in gene specific mRNA export and protein translation during spermatogenesis. *Journal of Biological Chemistry* 2006;281(46):35048-35056.

---

**ELAVL2 (HuB) and ELAVL4 (HuD):** Pan neuronally expressed. Involved in PNS development and associated with axonal growth cones.

Smith CL, Afroz R, Bassell GJ, Furneaux HM, Perrone-Bizzozero NI, Burry RW. GAP-43 mRNA in growth cones is associated with HuD and ribosomes. *Journal of neurobiology* 2004;61(2):222-235.

---

---

**Supplementary Table 2.** Genes corresponding to TFs, co-factors, splicing factors and RNA binding and trafficking proteins expressed in the hDRG, but not strongly hDRG-enriched and mDRG-enriched. Some of these genes are likely functional in the mammalian DRG.

| Gene                    | NF1  | NF2  | NF3  | NF4  | NF5  | NP1  | NP2  | NP3  | PEP1 | PEP2 | TH   | Detected in # cells / 706 |
|-------------------------|------|------|------|------|------|------|------|------|------|------|------|---------------------------|
| Insm2                   | 0.03 | 0.00 | 0.00 | 0.00 | 0.00 | 0.25 | 0.19 | 0.08 | 0.02 | 0.12 | 0.01 | 81                        |
| Ntrk1                   | 0.00 | 0.00 | 0.00 | 0.05 | 0.00 | 0.07 | 0.59 | 0.17 | 0.50 | 0.88 | 0.03 | 212                       |
| Kcnh6                   | 0.00 | 0.00 | 0.08 | 0.00 | 0.04 | 0.13 | 0.06 | 0.25 | 0.02 | 0.00 | 0.21 | 112                       |
| Ret                     | 0.13 | 0.58 | 0.83 | 0.00 | 0.04 | 0.82 | 0.63 | 0.33 | 0.27 | 0.18 | 0.94 | 549                       |
| Stmn2                   | 1.00 | 1.00 | 1.00 | 1.00 | 1.00 | 0.99 | 1.00 | 1.00 | 0.98 | 1.00 | 1.00 | 683                       |
| Trpv1                   | 0.00 | 0.00 | 0.00 | 0.05 | 0.00 | 0.03 | 0.28 | 0.58 | 0.31 | 0.06 | 0.00 | 62                        |
| Amigo3                  | 0.32 | 0.25 | 0.17 | 0.36 | 0.42 | 0.27 | 0.25 | 0.33 | 0.05 | 0.12 | 0.17 | 325                       |
| Tmem72                  | 0.42 | 0.35 | 0.08 | 0.46 | 0.50 | 0.26 | 0.31 | 0.00 | 0.16 | 0.24 | 0.72 | 411                       |
| Nefh                    | 0.81 | 0.96 | 0.92 | 0.73 | 1.00 | 0.01 | 0.00 | 0.00 | 0.13 | 0.65 | 0.01 | 518                       |
| Avil                    | 0.94 | 0.96 | 1.00 | 0.68 | 0.73 | 0.96 | 0.88 | 1.00 | 0.47 | 0.94 | 0.86 | 601                       |
| Polr3g                  | 0.16 | 0.54 | 1.00 | 0.27 | 0.31 | 0.45 | 0.53 | 0.58 | 0.16 | 0.71 | 0.31 | 355                       |
| Uchl1                   | 1.00 | 1.00 | 1.00 | 1.00 | 1.00 | 1.00 | 0.97 | 1.00 | 0.97 | 1.00 | 1.00 | 687                       |
| Akap12                  | 1.00 | 0.81 | 0.92 | 0.82 | 0.89 | 0.82 | 0.91 | 1.00 | 0.59 | 0.53 | 0.88 | 588                       |
| Nmb                     | 0.00 | 0.02 | 0.58 | 0.00 | 0.00 | 0.94 | 0.75 | 0.67 | 0.39 | 1.00 | 0.16 | 389                       |
| Ppm1j                   | 0.97 | 0.77 | 0.83 | 0.46 | 0.08 | 0.54 | 0.09 | 0.00 | 0.02 | 0.06 | 0.37 | 417                       |
| Sncg                    | 0.97 | 1.00 | 1.00 | 1.00 | 0.69 | 1.00 | 1.00 | 1.00 | 0.95 | 1.00 | 0.99 | 690                       |
| Ahnak2                  | NA                        |
| Gng3                    | 1.00 | 1.00 | 1.00 | 1.00 | 0.96 | 0.98 | 1.00 | 1.00 | 0.83 | 1.00 | 0.99 | 662                       |
| Kcnd1                   | 0.48 | 0.42 | 0.67 | 0.27 | 0.19 | 0.38 | 0.22 | 0.08 | 0.05 | 0.29 | 0.35 | 274                       |
| Fkbp1b                  | 0.61 | 0.42 | 0.42 | 0.55 | 0.15 | 0.38 | 0.28 | 0.00 | 0.34 | 0.59 | 0.61 | 499                       |
| Egr2                    | 0.03 | 0.06 | 0.00 | 0.05 | 0.00 | 0.05 | 0.00 | 0.00 | 0.02 | 0.06 | 0.03 | 32                        |
| Susd2                   | 0.77 | 0.88 | 0.92 | 0.36 | 0.35 | 0.34 | 0.13 | 0.25 | 0.31 | 0.88 | 0.67 | 482                       |
| Ngfr                    | 0.90 | 0.71 | 1.00 | 0.18 | 0.42 | 0.02 | 0.31 | 0.00 | 0.42 | 1.00 | 0.47 | 379                       |
| Plekha4                 | 0.00 | 0.04 | 0.00 | 0.05 | 0.00 | 0.02 | 0.03 | 0.00 | 0.02 | 0.00 | 0.00 | 27                        |
| Prx                     | 0.00 | 0.02 | 0.00 | 0.00 | 0.08 | 0.01 | 0.00 | 0.00 | 0.02 | 0.12 | 0.03 | 27                        |
| Tubb3                   | 1.00 | 1.00 | 1.00 | 1.00 | 1.00 | 0.97 | 0.97 | 1.00 | 0.95 | 1.00 | 0.92 | 671                       |
| Trim36                  | 0.55 | 0.77 | 0.83 | 0.64 | 0.62 | 0.68 | 0.66 | 0.67 | 0.30 | 0.53 | 0.46 | 467                       |
| Ppp1r1c                 | 1.00 | 0.85 | 1.00 | 0.77 | 0.62 | 0.95 | 0.78 | 1.00 | 0.56 | 0.94 | 0.91 | 600                       |
| Prune2                  | 1.00 | 0.98 | 1.00 | 0.77 | 1.00 | 0.81 | 0.72 | 0.67 | 0.69 | 0.88 | 0.93 | 629                       |
| Accn3                   | 0.00 | 0.31 | 0.00 | 0.27 | 0.00 | 0.00 | 0.00 | 0.00 | 0.14 | 0.59 | 0.00 | 140                       |
| Dusp15                  | 0.19 | 0.08 | 0.17 | 0.00 | 0.08 | 0.06 | 0.03 | 0.00 | 0.03 | 0.12 | 0.03 | 83                        |
| Mpz                     | 0.00 | 0.00 | 0.00 | 0.00 | 0.08 | 0.04 | 0.03 | 0.00 | 0.00 | 0.00 | 0.05 | 77                        |
| Tppp3                   | 1.00 | 1.00 | 1.00 | 0.86 | 0.42 | 0.99 | 0.94 | 0.92 | 0.88 | 1.00 | 1.00 | 688                       |
| Col28a1                 | 0.00 | 0.02 | 0.00 | 0.00 | 0.04 | 0.02 | 0.00 | 0.00 | 0.02 | 0.00 | 0.00 | 11                        |
| Prph                    | 0.87 | 0.88 | 0.67 | 0.46 | 0.35 | 0.98 | 0.94 | 1.00 | 0.81 | 0.82 | 0.94 | 672                       |
| P2rx3                   | 0.03 | 0.00 | 0.17 | 0.00 | 0.00 | 0.86 | 0.47 | 0.58 | 0.16 | 0.35 | 0.10 | 312                       |
| Isl1                    | 0.10 | 0.40 | 0.08 | 0.77 | 0.46 | 0.29 | 0.38 | 0.00 | 0.09 | 0.29 | 0.37 | 428                       |
| Scn9a                   | 0.39 | 0.52 | 0.67 | 0.23 | 0.00 | 0.54 | 0.66 | 0.75 | 0.39 | 0.77 | 0.78 | 569                       |
| Htr3a                   | 0.52 | 0.27 | 0.00 | 0.05 | 0.00 | 0.00 | 0.13 | 0.00 | 0.05 | 0.82 | 0.00 | 128                       |
| Sfrp5                   | 0.03 | 0.06 | 0.00 | 0.00 | 0.00 | 0.03 | 0.06 | 0.00 | 0.06 | 0.00 | 0.05 | 51                        |
| Pirt                    | 0.13 | 0.38 | 0.92 | 0.18 | 0.04 | 0.82 | 0.81 | 0.67 | 0.63 | 0.88 | 0.38 | 530                       |
| Ctnf                    | 0.07 | 0.02 | 0.00 | 0.00 | 0.00 | 0.02 | 0.00 | 0.00 | 0.00 | 0.00 | 0.01 | 8                         |
| A330049M08rik / Ncmap   | 0.00 | 0.00 | 0.00 | 0.00 | 0.04 | 0.01 | 0.03 | 0.00 | 0.00 | 0.06 | 0.02 | 17                        |
| Hoxd1                   | 0.58 | 0.25 | 0.75 | 0.05 | 0.04 | 0.03 | 0.03 | 0.08 | 0.06 | 0.53 | 0.04 | 104                       |
| Trim67                  | 0.65 | 0.42 | 0.58 | 0.32 | 0.27 | 0.40 | 0.41 | 0.25 | 0.17 | 0.35 | 0.42 | 310                       |
| Cldn19                  | 0.00 | 0.02 | 0.00 | 0.00 | 0.00 | 0.00 | 0.00 | 0.00 | 0.00 | 0.00 | 0.01 | 5                         |
| Ppef1                   | 0.26 | 0.19 | 0.00 | 0.09 | 0.00 | 0.48 | 0.28 | 0.25 | 0.13 | 0.06 | 0.37 | 258                       |
| Stc17a6                 | 0.90 | 0.71 | 0.92 | 0.05 | 0.35 | 0.48 | 0.44 | 0.08 | 0.36 | 0.77 | 0.64 | 478                       |
| Dhrs2                   | 0.00 | 0.02 | 0.00 | 0.00 | 0.04 | 0.00 | 0.00 | 0.00 | 0.00 | 0.06 | 0.01 | 8                         |
| Shox2                   | 0.07 | 0.13 | 0.00 | 0.14 | 0.42 | 0.01 | 0.03 | 0.00 | 0.00 | 0.00 | 0.00 | 42                        |
| Chrna6                  | 0.36 | 0.02 | 0.00 | 0.00 | 0.00 | 0.32 | 0.31 | 0.42 | 0.13 | 0.00 | 0.02 | 147                       |
| Scn11a                  | 0.00 | 0.00 | 0.00 | 0.00 | 0.00 | 0.90 | 0.78 | 0.83 | 0.31 | 0.18 | 0.33 | 443                       |
| Tusc5                   | 0.81 | 0.54 | 1.00 | 0.05 | 0.00 | 0.90 | 0.88 | 0.58 | 0.42 | 0.47 | 0.91 | 559                       |
| Bet3l / Trappc3l        | 0.00 | 0.13 | 0.75 | 0.18 | 0.00 | 0.01 | 0.06 | 0.08 | 0.09 | 0.82 | 0.02 | 84                        |
| Kcnk18                  | 0.45 | 0.04 | 0.00 | 0.00 | 0.00 | 0.19 | 0.34 | 0.00 | 0.00 | 0.06 | 0.00 | 85                        |
| Scn10a                  | 0.00 | 0.00 | 0.00 | 0.00 | 0.00 | 0.76 | 0.63 | 0.42 | 0.28 | 0.59 | 0.23 | 482                       |
| Pou4f1                  | 0.58 | 0.56 | 0.83 | 0.23 | 0.35 | 0.46 | 0.34 | 0.08 | 0.31 | 0.47 | 0.82 | 540                       |
| Pou4f2                  | 0.16 | 0.06 | 0.00 | 0.00 | 0.12 | 0.07 | 0.00 | 0.00 | 0.05 | 0.00 | 0.47 | 285                       |
| Pou4f3                  | 0.13 | 0.13 | 0.33 | 0.09 | 0.12 | 0.01 | 0.00 | 0.00 | 0.13 | 0.59 | 0.01 | 97                        |
| Mrgprx1                 | 0.00 | 0.00 | 0.00 | 0.00 | 0.00 | 0.07 | 0.53 | 0.33 | 0.00 | 0.00 | 0.00 | 43                        |
| Tmem72                  | 0.29 | 0.13 | 0.00 | 0.00 | 0.00 | 0.01 | 0.00 | 0.25 | 0.02 | 0.00 | 0.27 | 175                       |
| Prdm12                  | 0.00 | 0.02 | 0.00 | 0.00 | 0.00 | 0.41 | 0.41 | 0.33 | 0.31 | 0.47 | 0.39 | 320                       |
| Calcb                   | 0.03 | 0.25 | 0.17 | 0.00 | 0.00 | 0.88 | 0.78 | 0.00 | 0.44 | 0.71 | 0.60 | 526                       |
| Pla2g3                  | 0.32 | 0.23 | 0.50 | 0.00 | 0.04 | 0.09 | 0.00 | 0.00 | 0.00 | 0.18 | 0.09 | 82                        |
| Mrgprd                  | 0.03 | 0.02 | 0.00 | 0.00 | 0.04 | 0.84 | 0.22 | 0.00 | 0.02 | 0.00 | 0.01 | 161                       |
| Chrb3                   | 0.00 | 0.00 | 0.00 | 0.00 | 0.00 | 0.05 | 0.00 | 0.00 | 0.08 | 0.00 | 0.00 | 20                        |
| Skor2                   | 0.48 | 0.27 | 0.17 | 0.00 | 0.00 | 0.03 | 0.00 | 0.00 | 0.00 | 0.06 | 0.06 | 76                        |
| Isl2                    | 0.36 | 0.25 | 0.25 | 0.00 | 0.04 | 0.52 | 0.63 | 0.42 | 0.14 | 0.47 | 0.72 | 442                       |
| Fam19a3                 | 0.42 | 0.23 | 0.33 | 0.00 | 0.04 | 0.06 | 0.00 | 0.00 | 0.00 | 0.06 | 0.06 | 75                        |
| Foxd3                   | 0.00 | 0.06 | 0.00 | 0.05 | 0.08 | 0.02 | 0.03 | 0.00 | 0.00 | 0.06 | 0.02 | 20                        |
| Gfra3                   | 0.00 | 0.00 | 0.00 | 0.05 | 0.00 | 0.00 | 0.09 | 0.33 | 0.42 | 0.00 | 0.00 | 61                        |
| Il17b                   | 0.00 | 0.00 | 0.00 | 0.00 | 0.04 | 0.00 | 0.00 | 0.00 | 0.00 | 0.00 | 0.00 | 1                         |
| Ptgdr                   | 0.07 | 0.00 | 0.00 | 0.00 | 0.00 | 0.40 | 0.22 | 0.00 | 0.03 | 0.00 | 0.12 | 229                       |
| Tlx3                    | 0.10 | 0.10 | 0.00 | 0.09 | 0.00 | 0.06 | 0.03 | 0.00 | 0.08 | 0.00 | 0.09 | 127                       |
| Dhh                     | 0.03 | 0.00 | 0.00 | 0.00 | 0.00 | 0.04 | 0.00 | 0.00 | 0.00 | 0.00 | 0.05 | 40                        |
| Prrxl1 / Drgx           | 0.07 | 0.02 | 0.00 | 0.00 | 0.00 | 0.06 | 0.06 | 0.00 | 0.03 | 0.06 | 0.09 | 99                        |
| Calca                   | 0.00 | 0.00 | 0.08 | 0.00 | 0.00 | 0.20 | 0.88 | 0.08 | 0.78 | 1.00 | 0.01 | 511                       |
| Scrt2                   | 0.26 | 0.27 | 0.17 | 0.18 | 0.19 | 0.09 | 0.09 | 0.08 | 0.06 | 0.06 | 0.08 | 156                       |
| 3830431G21rik / Plekhd1 | 0.42 | 0.29 | 0.33 | 0.46 | 0.62 | 0.01 | 0.00 | 0.00 | 0.08 | 0.35 | 0.22 | 212                       |
| Tlx2                    | 0.10 | 0.04 | 0.25 | 0.05 | 0.23 | 0.22 | 0.13 | 0.17 | 0.09 | 0.24 | 0.19 | 229                       |
| Kcns1                   | 0.42 | 0.52 | 0.75 | 0.59 | 0.92 | 0.09 | 0.03 | 0.00 | 0.02 | 0.18 | 0.06 | 142                       |

**Supplementary Table 3. Putative assignment of cell type expression for hDRG enriched genes based on single cell RNA seq data from mouse.** DRG neuron cell type-specific values for hDRG-enriched genes based on mDRG scRNA-seq data from Usoskin et al. Color coding in expression value cells (in TPMs) shows low (blue) to high expression (red). Purple highlighted gene names do not show expression in any DRG neuron subclass. (NF = neurofilament; NP = non-peptidergic; PEP = peptidergic ; TH = tyrosine hydroxylase).

## Gene list

- 
- EGR2:** hDRG and mDRG enriched, low or no detectable expression in mDRG neuronal scRNA-seq dataset. TF involved in Schwann cell development.  
Warner LE, Mancias P, Butler IJ, McDonald CM, Keppen L, Koob KG, Lupski JR. Mutations in the early growth response 2 (EGR2) gene are associated with hereditary myelinopathies. *Nature genetics* 1998;18(4):382-384
- 
- FOXD3:** hDRG and mDRG enriched, low or no detectable expression in mDRG neuronal scRNA-seq dataset. TF involved in Schwann cell development.  
Thomas AJ, Erickson CA. FOXD3 regulates the lineage switch between neural crest-derived glial cells and pigment cells by repressing MITF through a noncanonical mechanism. *Development* 2009;136(11):1849-1858.
- 
- DUSP15:** hDRG and mDRG enriched, low or no detectable expression in mDRG neuronal scRNA-seq dataset. Phosphatase involved in myelinating cell development in both CNS (oligodendrocyte) and PNS (Schwann cells)  
Rodríguez-Molina JF, Lopez-Anido C, Ma KH, Zhang C, Olson T, Muth KN, Weider M, Svaren J. Dual specificity phosphatase 15 regulates Erk activation in Schwann cells. *Journal of Neurochemistry* 2017.
- 
- PLEKHA4:** hDRG and mDRG enriched, low or no detectable expression in mDRG neuronal scRNA-seq dataset. Known expression in Schwann cells.  
Schmid D, Zeis T, Schaeren-Wiemers N. Transcriptional regulation induced by cAMP elevation in mouse Schwann cells. *ASN neuro* 2014; 6(3): AN20130031.
- 
- COL28A1:** hDRG and mDRG enriched, low or no detectable expression in mDRG neuronal scRNA-seq dataset. Known expression in Schwann cells.  
Hubert T, Grimal S, Carroll P, Fichard-Carroll A. Collagens in the developing and diseased nervous system. *Cellular and molecular life sciences* 2009;66(7):1223-1238.
- 
- SFRP5:** hDRG and mDRG enriched, low or no detectable expression in mDRG neuronal scRNA-seq dataset. Known expression in Schwann cells.  
Luscan A, Masliah-Planchon J, Laurendeau I, Ortonne N, Varin J, Lallemand F, Leroy K, Dumaine V, Hivelin M, Borderie D. The activation of the WNT signalling pathway is a hallmark in Neurofibromatosis type 1 tumorigenesis. *Clinical Cancer Research* 2013;clincanres. 0780.2013.
- 
- CLDN19:** hDRG and mDRG enriched, low or no detectable expression in mDRG neuronal scRNA-seq dataset. Known expression in Schwann cells involved in cell – cell junction maintenance.  
Kikuchi S, Ninomiya T, Tatsumi H, Sawada N, Kojima T. Tricellulin is expressed in autotypic tight junctions of peripheral myelinating Schwann cells. *Journal of Histochemistry & Cytochemistry* 2010;58(12):1067-1073.
- 
- PRX:** hDRG and mDRG enriched, low or no detectable expression in mDRG neuronal scRNA-seq dataset. Known expression in myelinating Schwann cells.  
Gillespie CS, Sherman DL, Blair GE, Brophy PJ. Periaxin, a novel protein of myelinating Schwann cells with a possible role in axonal ensheathment. *Neuron* 1994;12(3):497-508.
- 
- CNTF:** hDRG and mDRG enriched, low or no detectable expression in mDRG neuronal scRNA-seq dataset. Known expression in myelinating Schwann cells, involved in regulating tyrosine phosphorylation of STAT3, which is an important TF in Schwann cell repair mechanism.  
Friedman B, Scherer SS, Rudge JS, Helgren M, Morrisey D, McClain J, Wang D-y, Wiegand SJ, Furth ME, Lindsay RM. Regulation of ciliary neurotrophic factor expression in myelin-related Schwann cells in vivo. *Neuron* 1992;9(2):295-305  
Benito C, Davis CM, Gomez-Sanchez JA, Turmaine M, Meijer D, Poli V, Mirsky R, Jessen KR. STAT3 controls the long-term survival and phenotype of repair Schwann cells during nerve regeneration. *Journal of Neuroscience* 2017:3481-3416.
- 
- NCMAP:** hDRG and mDRG enriched, low or no detectable expression in mDRG neuronal scRNA-seq dataset. Known expression in myelinating Schwann cells, involved in Myelin assembly.  
Ryu EJ, Yang M, Gustin JA, Chang L-W, Freimuth RR, Nagarajan R, Milbrandt J. Analysis of peripheral nerve expression profiles identifies a novel myelin glycoprotein, MP11. *Journal of Neuroscience* 2008;28(30):7563-7573.
- 
- MPZ:** hDRG and mDRG enriched, low or no detectable expression in mDRG neuronal scRNA-seq dataset. Known expression in myelinating Schwann cells.  
Nagarajan R, Le N, Mahoney H, Araki T, Milbrandt J. Deciphering peripheral nerve myelination by using Schwann cell expression profiling. *Proceedings of the National Academy of Sciences* 2002;99(13):8998-9003.
- 
- DHH:** hDRG and mDRG enriched, low or no detectable expression in mDRG neuronal scRNA-seq dataset. Known expression in myelinating Schwann cells.  
Parmantier E, Lynn B, Lawson D, Turmaine M, Namini SS, Chakrabarti L, McMahon AP, Jessen KR, Mirsky R. Schwann cell-derived Desert hedgehog controls the development of peripheral nerve sheaths. *Neuron* 1999;23(4):713-724.
- 
- GFRA3:** hDRG and mDRG enriched, low or no detectable expression in mDRG neuronal scRNA-seq dataset. Known to be expressed in both neurons and Schwann cells, potentially low or condition-specific expression in neurons avoids detection in scRNA-seq dataset.  
Widenfalk J, Tomac A, Lindqvist E, Hoffer B, Olson L. GFR $\alpha$ -3, a protein related to GFR $\alpha$ -1, is expressed in developing peripheral neurons and ensheathing cells. *European journal of neuroscience* 1998;10(4):1508-1517.
- 
- CHRN3:** hDRG and mDRG enriched, low or no detectable expression in mDRG neuronal scRNA-seq dataset in spite of known neuronal expression.  
Albers KM, Zhang XL, Diges CM, Schwartz ES, Yang CI, Davis BM, Gold MS. Artemin growth factor increases nicotinic cholinergic receptor subunit expression and activity in nociceptive sensory neurons. *Molecular pain* 2014;10(1):31.
- 
- IL17B:** hDRG and mDRG enriched, low or no detectable expression in mDRG neuronal scRNA-seq dataset in spite of known neuronal expression.  
Moore EE, Presnell S, Garrigues U, Guillot A, LeGuern E, Smith D, Yao L, Whitmore TE, Gilbert T, Palmer TD. Expression of IL-17B in neurons and evaluation of its possible role in the chromosome 5q-linked form of Charcot-Marie-Tooth disease. *Neuromuscular Disorders* 2002;12(2):141-150.
- 
- 

**Supplementary Table 4. DRG enriched genes that are undetected in Usoskin *et al* dataset.** hDRG and mDRG enriched genes detected in less than 10% of sequenced mDRG neurons, and stably expressed in less than half of any of the sensory neuronal subpopulations based on analysis in Usoskin *et al*. Literature driven search suggests a distinctive transcriptional program for peripheral glia conserved between human and mouse.

| Term (GO ID)                                                      | P-value | Adjusted P-value | Genes                                                     |
|-------------------------------------------------------------------|---------|------------------|-----------------------------------------------------------|
| nerve development (GO:0021675)                                    | 1.5E-07 | 0.000109         | NTRK1; NGFR; POU4F1; POU4F3; DRGX                         |
| detection of temperature stimulus (GO:0016048)                    | 4E-07   | 0.000146         | NTRK1; NGFR; CALCA; DRGX                                  |
| cranial nerve development (GO:0021545)                            | 1.2E-06 | 0.000297         | NTRK1; POU4F1; POU4F3; DRGX                               |
| regulation of neuron differentiation (GO:0045664)                 | 4.6E-06 | 0.000841         | NTRK1; RET; NGFR; ISL2; SKOR2; TLX3; TLX2; STMN2; KLK8    |
| retinal ganglion cell axon guidance (GO:0031290)                  | 4.3E-05 | 0.002424         | ISL2; POU4F2; POU4F3                                      |
| neuron differentiation (GO:0030182)                               | 6.6E-06 | 0.000957         | NTRK1; ISL2; SKOR2; HOXD1; POU4F1; POU4F2; POU4F3         |
| negative regulation of neuron differentiation (GO:0045665)        | 7.8E-06 | 0.000957         | NGFR; ISL2; TLX3; TLX2; STMN2; KLK8                       |
| neuron projection guidance (GO:0097485)                           | 1.9E-05 | 0.001642         | NTRK1; NGFR; ISL2; TUBB3; GFRA3; POU4F2; POU4F3; DRGX     |
| axon guidance (GO:0007411)                                        | 1.9E-05 | 0.001642         | NTRK1; NGFR; ISL2; TUBB3; GFRA3; POU4F2; POU4F3; DRGX     |
| regulation of neuron projection development (GO:0010975)          | 2.6E-05 | 0.001709         | NTRK1; RET; NGFR; SKOR2; TLX2; STMN2; KLK8                |
| detection of abiotic stimulus (GO:0009582)                        | 2.2E-05 | 0.001642         | NTRK1; NGFR; CALCA; CHRNA9; PPEF1; DRGX                   |
| detection of external stimulus (GO:0009581)                       | 2E-05   | 0.001642         | NTRK1; NGFR; CALCA; CHRNA9; PPEF1; DRGX                   |
| neuron fate specification (GO:0048665)                            | 7.2E-05 | 0.003296         | ISL2; TLX3; POU4F1                                        |
| negative regulation of neurogenesis (GO:0050768)                  | 3.4E-05 | 0.002069         | NGFR; ISL2; TLX3; TLX2; STMN2; KLK8                       |
| negative regulation of nervous system development (GO:0051961)    | 5.6E-05 | 0.002761         | NGFR; ISL2; TLX3; TLX2; STMN2; KLK8                       |
| response to temperature stimulus (GO:0009266)                     | 4.7E-05 | 0.002453         | NTRK1; NGFR; CALCA; P2RX3; DRGX                           |
| neuronal action potential (GO:0019228)                            | 0.00011 | 0.004296         | SCN10A; P2RX3; SCN11A                                     |
| sensory perception (GO:0007600)                                   | 8.8E-05 | 0.003783         | SCN10A; P2RX3; HOXD1; SFRP5; POU4F1; POU4F2; POU4F3; DRGX |
| negative regulation of cell development (GO:0010721)              | 0.00011 | 0.004296         | NGFR; ISL2; TLX3; TLX2; STMN2; KLK8                       |
| response to pain (GO:0048265)                                     | 0.00018 | 0.006507         | RET; CALCA; P2RX3                                         |
| regulation of cell projection organization (GO:0031344)           | 0.00022 | 0.007425         | NTRK1; RET; NGFR; SKOR2; TLX2; STMN2; KLK8                |
| negative regulation of neuron projection development (GO:0010977) | 0.00022 | 0.007425         | NGFR; TLX2; STMN2; KLK8                                   |
| synaptic transmission (GO:0007268)                                | 0.00041 | 0.012682         | CHRN3; P2RX3; CHRNA6; CHRNA9; SNCG; HTR3A; KCNK18         |

**Supplementary Table 5. Overlap of hDRG-enriched genes with biological processes in the Gene Ontology database.** Three broad categories are highlighted: differentiation and development (blue), growth and regeneration (orange), sensory perception and signal transduction (green)

| <b>Term (GO ID)</b>                                                                               | <b>P-value</b> | <b>Adjusted P-value</b> | <b>Genes</b>         |
|---------------------------------------------------------------------------------------------------|----------------|-------------------------|----------------------|
| Activation of Nicotinic Acetylcholine Receptors H. sapiens (R-HSA-629602)                         | 1.3E-05        | 0.00043                 | CHRNA6;CHRNA9;CHRNA3 |
| Acetylcholine Binding And Downstream Events H. sapiens (R-HSA-181431)                             | 1.3E-05        | 0.00043                 | CHRNA6;CHRNA9;CHRNA3 |
| Postsynaptic nicotinic acetylcholine receptors H. sapiens (R-HSA-622327)                          | 1.3E-05        | 0.00043                 | CHRNA6;CHRNA9;CHRNA3 |
| Highly calcium permeable postsynaptic nicotinic acetylcholine receptors H. sapiens (R-HSA-629594) | 1.3E-05        | 0.00043                 | CHRNA6;CHRNA9;CHRNA3 |
| Highly calcium permeable postsynaptic nicotinic acetylcholine receptors H. sapiens (R-HSA-629594) | 6.8E-06        | 0.00043                 | CHRNA6;CHRNA9;CHRNA3 |
| Presynaptic nicotinic acetylcholine receptors H. sapiens (R-HSA-622323)                           | 0.00066        | 0.012933                | CHRNA6;CHRNA3        |
| Highly calcium permeable nicotinic acetylcholine receptors H. sapiens (R-HSA-629597)              | 0.0004         | 0.01098                 | CHRNA6;CHRNA3        |
| Regulation of TP53 Activity through Association with Co-factors H. sapiens (R-HSA-6804759)        | 0.00087        | 0.014872                | POU4F1;POU4F2        |
| Calcitonin-like ligand receptors H. sapiens (R-HSA-419812)                                        | 0.00048        | 0.01098                 | CALCA;CALCB          |

---

**Supplementary Table 6. Overlap of hDRG-enriched genes with molecular pathways in the Reactome database.**
